# Supplementary material for: Prevalence of sexual dysfunctions and associated risk factors in Poland
Source: PubMed Central journal article supplement — Arch Med Sci. 2019 Jul 22;18(4):1031–40. doi: 10.5114/aoms.2019.86794 (PMC9266947; doi:10.5114/aoms.2019.86794), 2019-07-22
Supplement: AMS-18-4-109330-s1.pdf [file AMS-18-4-109330-s1.pdf]

Supplementary Table S1.

| Parameter                                | Female sexual interest/arousal disorder          |      |                           |      | Female orgasmic disorder |      |                 |      | Genito-pelvic pain or penetration disorder |      |                  |      | Other sexual disorders |      |                          |      |                      |      |
|------------------------------------------|--------------------------------------------------|------|---------------------------|------|--------------------------|------|-----------------|------|--------------------------------------------|------|------------------|------|------------------------|------|--------------------------|------|----------------------|------|
|                                          | Reduced sexual needs/<br>lack of interest in sex |      | Sex is not<br>pleasurable |      | Rarely<br>climaxing      |      | Anorga-<br>smia |      | Pain during<br>intercourse                 |      | Dyspa-<br>reunia |      | Lack<br>of lubrication |      | Climaxing<br>too quickly |      | Hiperitibi-<br>demia |      |
|                                          | N                                                | %    | N                         | %    | N                        | %    | N               | %    | N                                          | %    | N                | %    | N                      | %    | N                        | %    | N                    | %    |
|                                          | 117                                              |      | 51                        |      | 115                      |      | 85              |      | 77                                         |      | 16               |      | 69                     |      | 21                       |      | 22                   |      |
| Age [years]:                             |                                                  |      |                           |      |                          |      |                 |      |                                            |      |                  |      |                        |      |                          |      |                      |      |
| 18–24                                    | 11                                               | 9.4  | 7                         | 13.7 | 17                       | 14.8 | 14              | 16.5 | 14                                         | 18.2 | 4                | 25   | 10                     | 14.5 | 5                        | 23.8 | 7                    | 31.8 |
| 25–34                                    | 28                                               | 23.9 | 15                        | 29.4 | 35                       | 30.4 | 25              | 29.4 | 20                                         | 26   | 5                | 31.3 | 8                      | 11.6 | 2                        | 9.5  | 4                    | 18.2 |
| 35–49                                    | 30                                               | 25.6 | 19                        | 37.3 | 33                       | 28.7 | 26              | 30.6 | 23                                         | 29.9 | 3                | 18.8 | 24                     | 34.8 | 5                        | 23.8 | 8                    | 36.4 |
| 50–59                                    | 20                                               | 17.1 | 5                         | 9.8  | 12                       | 10.4 | 8               | 9.4  | 8                                          | 10.4 | 2                | 12.5 | 12                     | 17.4 | 5                        | 23.8 | 0                    | 0    |
| > 60                                     | 28                                               | 23.9 | 5                         | 9.8  | 18                       | 15.7 | 12              | 14.1 | 12                                         | 15.6 | 2                | 12.5 | 15                     | 27.5 | 4                        | 19   | 3                    | 13.6 |
| Education:                               |                                                  |      |                           |      |                          |      |                 |      |                                            |      |                  |      |                        |      |                          |      |                      |      |
| Primary                                  | 16                                               | 7.1  | 3                         | 5.9  | 9                        | 7.8  | 7               | 8.2  | 2                                          | 2.6  | 2                | 12.5 | 2                      | 2.6  | 3                        | 14.3 | 1                    | 4.5  |
| Secondary                                | 101                                              | 45.1 | 25                        | 49   | 50                       | 43.5 | 38              | 44.7 | 38                                         | 49.4 | 10               | 62.5 | 38                     | 49.4 | 11                       | 52.4 | 12                   | 54.5 |
| Higher (Bachelor/Master degree)          | 107                                              | 47.8 | 23                        | 45.1 | 56                       | 48.7 | 40              | 47.1 | 37                                         | 48.1 | 4                | 25   | 37                     | 48.1 | 7                        | 33.3 | 9                    | 40.9 |
| Marital status:                          |                                                  |      |                           |      |                          |      |                 |      |                                            |      |                  |      |                        |      |                          |      |                      |      |
| Single                                   | 5                                                | 4.3  | 3                         | 5.9  | 13                       | 11.3 | 9               | 10.6 | 6                                          | 7.8  | 2                | 12.5 | 3                      | 4.3  | 3                        | 14.3 | 4                    | 18.2 |
| Married                                  | 105                                              | 89.7 | 47                        | 92.2 | 95                       | 82.6 | 75              | 88.2 | 68                                         | 88.3 | 14               | 87.5 | 64                     | 92.8 | 16                       | 76.2 | 16                   | 72.7 |
| Divorced                                 | 6                                                | 5.1  | 1                         | 2    | 5                        | 4.3  | 1               | 1.2  | 2                                          | 2.6  |                  |      | 1                      | 1.4  | 1                        | 4.8  | 1                    | 4.5  |
| Widow                                    | 1                                                | 0.9  |                           |      | 2                        | 1.7  |                 |      | 1                                          | 1.3  |                  |      | 1                      | 1.4  | 1                        | 4.8  | 1                    | 4.5  |
| Children:                                |                                                  |      |                           |      |                          |      |                 |      |                                            |      |                  |      |                        |      |                          |      |                      |      |
| Yes                                      | 98                                               | 83.8 | 41                        | 80.4 | 78                       | 67.8 | 61              | 71.8 | 54                                         | 70.1 | 12               | 75   | 53                     | 76.8 | 18                       | 85.7 | 15                   | 68.2 |
| No                                       | 19                                               | 16.2 | 10                        | 19.6 | 37                       | 32.2 | 24              | 28.2 | 23                                         | 29.9 | 4                | 25   | 16                     | 23.2 | 3                        | 14.3 | 7                    | 31.8 |
| Attitude to religion:                    |                                                  |      |                           |      |                          |      |                 |      |                                            |      |                  |      |                        |      |                          |      |                      |      |
| Neutral or non believer                  | 97                                               | 82.9 | 8                         | 15.7 | 16                       | 13.9 | 14              | 16.5 | 14                                         | 18.2 | 3                | 18.8 | 12                     | 17.4 | 6                        | 28.6 | 3                    | 13.6 |
| Believers                                | 20                                               | 17.1 | 43                        | 84.3 | 99                       | 86.1 | 71              | 83.5 | 63                                         | 81.8 | 13               | 81.3 | 57                     | 82.6 | 15                       | 71.4 | 19                   | 86.4 |
| Health assessment in previous year:      |                                                  |      |                           |      |                          |      |                 |      |                                            |      |                  |      |                        |      |                          |      |                      |      |
| Healthy or rather healthy                | 100                                              | 85.5 | 46                        | 90.2 | 96                       | 83.5 | 77              | 90.6 | 66                                         | 85.7 | 12               | 75   | 59                     | 85.5 | 13                       | 61.9 | 16                   | 72.7 |
| Health issues                            | 16                                               | 13.7 | 5                         | 9.8  | 18                       | 15.7 | 7               | 8.2  | 10                                         | 13   | 4                | 25   | 10                     | 14.5 | 8                        | 38.1 | 6                    | 27.3 |
| Chronic diseases:                        |                                                  |      |                           |      |                          |      |                 |      |                                            |      |                  |      |                        |      |                          |      |                      |      |
| Yes                                      | 37                                               | 31.6 | 15                        | 29.4 | 36                       | 31.3 | 24              | 28.2 | 20                                         | 26   | 5                | 31.3 | 24                     | 34.8 | 11                       | 52.4 | 8                    | 36.4 |
| No                                       | 80                                               | 68.4 | 36                        | 70.6 | 79                       | 68.7 | 61              | 71.8 | 57                                         | 74   | 11               | 68.8 | 45                     | 65.2 | 10                       | 47.6 | 14                   | 63.6 |
| Occupational status:                     |                                                  |      |                           |      |                          |      |                 |      |                                            |      |                  |      |                        |      |                          |      |                      |      |
| Student                                  | 4                                                |      | 4                         |      | 13                       |      | 12              |      | 10                                         |      | 2                |      | 4                      |      | 3                        |      | 5                    |      |
| Employment                               | 61                                               |      | 28                        |      | 65                       |      | 40              |      | 42                                         |      | 8                |      | 37                     |      | 11                       |      | 12                   |      |
| Unemployment (and/or housewife, retired) | 56                                               |      | 21                        |      | 41                       |      | 37              |      | 31                                         |      | 7                |      | 28                     |      | 12                       |      | 7                    |      |
| Satisfaction with current job:           |                                                  |      |                           |      |                          |      |                 |      |                                            |      |                  |      |                        |      |                          |      |                      |      |
| Satisfied                                | 83                                               |      | 19                        |      | 44                       |      | 29              |      | 32                                         |      | 5                |      | 24                     |      | 6                        |      | 8                    |      |
| Not satisfied                            | 39                                               |      | 9                         |      | 21                       |      | 11              |      | 9                                          |      | 3                |      | 13                     |      | 5                        |      | 4                    |      |
| Time spend at work:                      |                                                  |      |                           |      |                          |      |                 |      |                                            |      |                  |      |                        |      |                          |      |                      |      |
| < 8 h                                    | 19                                               | 16.2 | 6                         | 11.8 | 17                       | 14.8 | 7               | 8.2  | 12                                         | 15.6 | 5                | 31.3 | 13                     | 18.8 | 3                        | 14.3 | 3                    | 13.6 |
| 8 h                                      | 34                                               | 29.1 | 19                        | 37.3 | 39                       | 33.9 | 27              | 31.8 | 23                                         | 29.9 | 2                | 12.5 | 20                     | 29   | 5                        | 23.8 | 4                    | 18.2 |
| > 8 h                                    | 8                                                | 6.8  | 3                         | 5.9  | 9                        | 7.8  | 6               | 7.1  | 6                                          | 7.8  | 1                | 6.3  | 4                      | 5.8  | 3                        | 14.3 | 5                    | 22.7 |

Supplementary Table SII.

| Parameter                                | Premature (early) ejaculation |                                    |                                  | Erectile Disorder                |                                  |                     | Delayed Ejaculation |                                               |                | Other sexual problems |    |      |
|------------------------------------------|-------------------------------|------------------------------------|----------------------------------|----------------------------------|----------------------------------|---------------------|---------------------|-----------------------------------------------|----------------|-----------------------|----|------|
|                                          | Premature (early) ejaculation | Ejaculation before the intercourse | Impotence during the intercourse | Impotence before the intercourse | Impotence before the intercourse | Delayed ejaculation | Lack of ejaculation | Reduced sexual needs/ lack of interest in sex | Hiperlipidemia |                       |    |      |
|                                          | N                             | %                                  | N                                | %                                | N                                | %                   | N                   | %                                             | N              | %                     | N  | %    |
| Age [years]:                             | 83                            |                                    | 15                               |                                  | 16                               |                     | 13                  |                                               | 16             |                       | 16 |      |
| 18–24                                    | 13                            | 15.7                               | 4                                | 26.7                             | 1                                | 6.3                 | 2                   | 15.4                                          | 1              | 6.3                   | 4  | 25   |
| 25–34                                    | 12                            | 14.5                               | 1                                | 6.7                              | 2                                | 12.5                | 2                   | 15.4                                          | 5              | 31.3                  | 4  | 25   |
| 35–49                                    | 20                            | 24.1                               | 3                                | 20                               | 2                                | 12.5                | 2                   | 15.4                                          | 6              | 37.5                  | 2  | 12.5 |
| 50–59                                    | 20                            | 24.1                               | 2                                | 13.3                             | 5                                | 31.3                | 2                   | 15.4                                          | 1              | 6.3                   | 2  | 12.5 |
| < 60                                     | 18                            | 21.7                               | 5                                | 33.3                             | 6                                | 37.5                | 5                   | 38.5                                          | 4              | 25                    | 4  | 25   |
| Education:                               |                               |                                    |                                  |                                  |                                  |                     |                     |                                               |                |                       |    |      |
| Primary                                  | 2                             | 2.6                                | 3                                | 20                               | 2                                | 12.5                | 3                   | 20                                            | 4              | 25                    | 1  | 6.3  |
| Secondary                                | 38                            | 49.4                               | 5                                | 33.3                             | 5                                | 31.3                | 5                   | 33.3                                          | 5              | 31.3                  | 6  | 37.5 |
| Higher (Bachelor/Master degree)          | 37                            | 48.1                               | 7                                | 46.7                             | 9                                | 56.3                | 7                   | 46.7                                          | 7              | 43.8                  | 9  | 56.3 |
| Marital status:                          |                               |                                    |                                  |                                  |                                  |                     |                     |                                               |                |                       |    |      |
| Single                                   | 13                            | 15.7                               | 4                                | 26.7                             |                                  |                     | 2                   | 15.4                                          | 2              | 12.5                  | 5  | 31.3 |
| Married                                  | 67                            | 80.7                               | 9                                | 60                               | 14                               | 87.5                | 7                   | 53.8                                          | 12             | 75                    | 9  | 56.3 |
| Divorced                                 | 2                             | 2.4                                | 1                                | 6.7                              | 2                                | 12.5                | 3                   | 23.1                                          | 2              | 12.5                  | 1  | 6.3  |
| Widow                                    | 1                             | 1.2                                | 1                                | 6.7                              |                                  |                     | 1                   | 7.7                                           | 2              | 12.5                  | 1  | 6.3  |
| Children:                                |                               |                                    |                                  |                                  |                                  |                     |                     |                                               |                |                       |    |      |
| Yes                                      | 55                            | 66.3                               | 10                               | 66.7                             | 14                               | 87.5                | 9                   | 69.2                                          | 9              | 56.3                  | 9  | 56.3 |
| No                                       | 28                            | 33.7                               | 5                                | 33.3                             | 2                                | 12.5                | 4                   | 30.8                                          | 7              | 43.8                  | 7  | 43.8 |
| Attitude to religion:                    |                               |                                    |                                  |                                  |                                  |                     |                     |                                               |                |                       |    |      |
| Neutral or non believer                  | 11                            | 13.3                               |                                  |                                  | 4                                | 25                  | 3                   | 23.1                                          | 5              | 31.3                  | 3  | 18.8 |
| Believers                                | 72                            | 86.7                               | 15                               | 100                              | 12                               | 75                  | 10                  | 76.9                                          | 11             | 68.8                  | 13 | 81.3 |
| Health assessment in previous year:      |                               |                                    |                                  |                                  |                                  |                     |                     |                                               |                |                       |    |      |
| Healthy or rather healthy                | 68                            | 81.9                               | 11                               | 73.3                             | 14                               | 87.5                | 9                   | 69.2                                          | 15             | 93.8                  | 12 | 75   |
| Health issues                            | 14                            | 16.9                               | 4                                | 26.7                             | 2                                | 12.5                | 4                   | 30.8                                          | 1              | 6.3                   | 3  | 18.8 |
| Chronic diseases:                        |                               |                                    |                                  |                                  |                                  |                     |                     |                                               |                |                       |    |      |
| Yes                                      | 22                            | 26.5                               | 4                                | 26.7                             | 9                                | 56.3                | 6                   | 46.2                                          | 5              | 31.3                  | 5  | 31.3 |
| No                                       | 61                            | 73.5                               | 11                               | 73.3                             | 7                                | 43.8                | 7                   | 53.8                                          | 11             | 68.8                  | 11 | 68.8 |
| Occupational status:                     |                               |                                    |                                  |                                  |                                  |                     |                     |                                               |                |                       |    |      |
| Student                                  | 12                            |                                    | 4                                |                                  | 2                                |                     | 2                   |                                               | 1              |                       | 5  |      |
| Employment                               | 53                            |                                    | 4                                |                                  | 3                                |                     | 2                   |                                               | 10             |                       | 6  |      |
| Unemployment (and/or housewife, retired) | 27                            |                                    | 8                                |                                  | 12                               |                     | 9                   |                                               | 8              |                       | 6  |      |
| Satisfaction with current job:           |                               |                                    |                                  |                                  |                                  |                     |                     |                                               |                |                       |    |      |
| Satisfied                                | 41                            |                                    | 4                                |                                  | 2                                |                     | 2                   |                                               | 8              |                       | 3  |      |
| Not satisfied                            | 12                            |                                    | 6                                |                                  | 1                                |                     | 1                   |                                               | 1              |                       | 3  |      |
| Time spend at work:                      |                               |                                    |                                  |                                  |                                  |                     |                     |                                               |                |                       |    |      |
| < 8 h                                    | 4                             | 4.8                                | 1                                | 6.7                              |                                  |                     | 1                   |                                               | 1              | 6.3                   | 2  | 12.5 |
| 8 h                                      | 32                            | 38.6                               | 2                                | 13.3                             | 2                                |                     | 1                   |                                               | 4              | 25                    | 3  | 18.8 |
| > 8 h                                    | 17                            | 20.5                               | 2                                | 13.3                             | 1                                |                     | 1                   |                                               | 4              | 25                    | 1  | 6.3  |
